# Supplementary material for: A Comparative Study between Beeswax and Glycerol Monostearate for Food-Grade Oleogels
Source: MDPI journal article supplement (doi:10.3390/gels10040214), 2024-03-22
Supplement: s1 [file s1]

# A Comparative Study between Beeswax and Glycerol Monostearate for the Food-Grade Oleogels

Francesca Malvano<sup>1</sup> Donatella Albanese<sup>1\*</sup>, Luciano Cinquanta<sup>2</sup>, Liparoti Sara<sup>1</sup>, Francesco Marra<sup>1</sup>

## Supplementary Materials

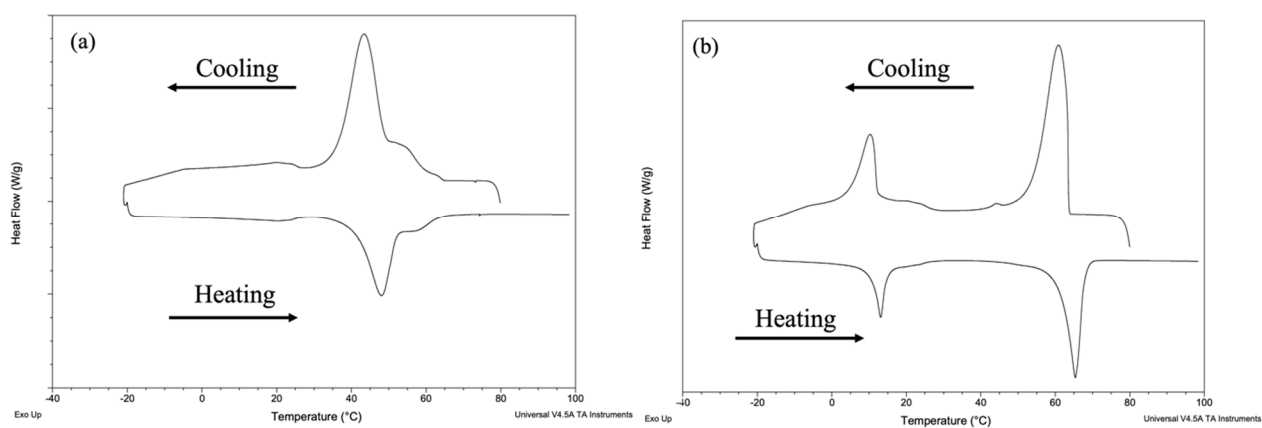

**Figure S1.** DSC curves of neat BW (a) and neat GMS (b)

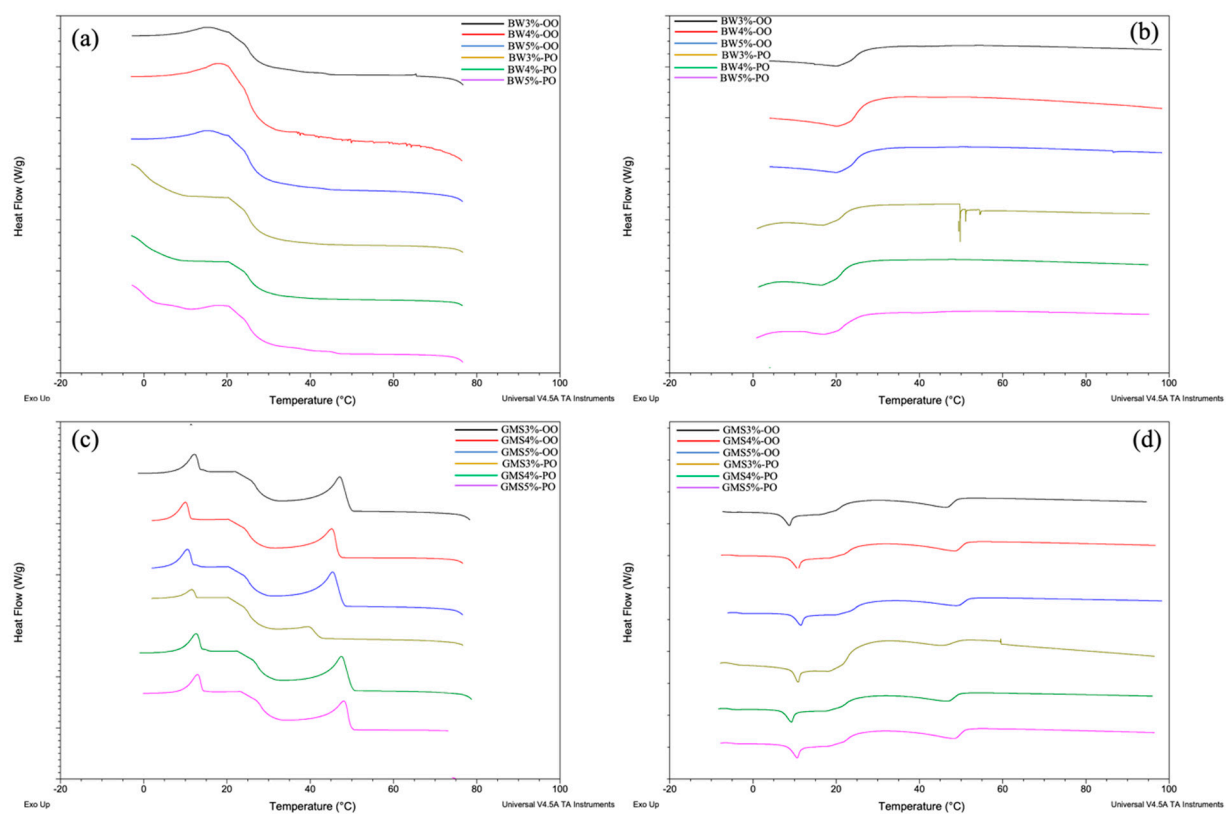

**Figure S2.** Crystallization curves of BW-based (a) and GMS-based (c) oleogels. Melting curves of BW-based (b) and GMS-based (d) oleogels
